# Supplementary material for: Acute Effects of Sex Steroid Hormones on Susceptibility to Cardiac Arrhythmias: A Simulation Study
Source: PLoS Comput Biol. 2010 Jan 29;6(1):e1000658. doi: 10.1371/journal.pcbi.1000658 (PMC2813260; doi:10.1371/journal.pcbi.1000658)
Supplement: Text S1 — Supplemental figures and methods. (0.22 MB DOC) [file pcbi.1000658.s007.doc]

**Text S1. Computational models and simulation protocols**

*Simulation of E2, progesterone and testosterone effects on channels*

We simulated the IKr current with addition of E2 by scaling the conductance of current and modifying the activation and inactivation curves. In the simulations, we shifted the IKr activation in the positive direction as experimental results suggested. Currents were scaled to the experimentally measured ratio of conductance: 0.98 for 0.1 nmol/L, 0.9 for 0.7 nmol/L and 0.86 for 1 nmol/L [1].

Rate constants in control case [2]

C1O or C1I

OC1

Rate constants in E2 applications

E2 = 0.1 nmol/L:

C1O or C1I

OC1

E2 = 0.7 nmol/L:

C1O or C1I

OC1

E2 = 1 nmol/L:

C1O or C1I

OC1

Progesterone and testosterone affect the conductance of IKs but have no distinguishable effects on its kinetics. We used the experimental data [3,4] to determine these values (see full dose-response curve for progesterone both experimentally measured and simulated in Figure S1). When progesterone was applied, we multiplied the conductance of IKs by scaling factors as follows: for progesterone 2.5 nmol/L: 1.19; for progesterone 40.6 nmol/L: 1.40; for progesterone 100 nmol/L: 1.42. As see in the Figure S1, 50% saturation occurs around 2.5 nM and the effect is nearly saturated at 40.6 nM. In addition, testosterone affects the conductance of IKs and ICa,L, by experimentally measured ratios as follows: for testosterone 10 nmol/L: IKs and ICa,L are 1.38 and 0.94, respectively; for testosterone 35 nmol/L: IKs and ICa,L are 1.40 and 0.8, respectively; for testosterone 300 nmol/L: IKs and ICa,L are 1.45 and 0.6, respectively.

Under the drug (IKr blocker  E-4031) condition, the scaling factors for conductance IKr are: 0.93 with no hormone addition; 0.875 with DHT 3 nM addition; 0.678 with E2 1 nM application [1]. DHT 3 nM affects the conductance of IKs and ICa,L by experimentally measured ratios as 1.3 and 0.96 [3].

*One-dimensional simulations*

We simulated a 1 cm fiber composed of 100 ventricular cellsconnected by resistances to simulate gap junctions [5]. Current flow is described by the following equation:

Where *V* is the membrane potential, *t* is time, *D* is the tissue diffusion coefficient (0.00092 cm2/ms, calculated from Shaw and Rudy [6]), *Iion* is the sum of transmembrane ionic currents, *Istim*is the stimulus current (300 mA/cm2 for 1 ms), and *Cm* is the membrane capacitance (1 F/cm2). The fiber was paced at BCL = 1000 ms for 50 beats. Action potential simulations were carried out in midmyocardial (M) cells by changing constant of GKs to 0.125 [7].

A pacing sequence consisted of 10 beats of (s1) basic pacing (500, 750 or 1000 ms) followed by a premature beat (s2) (same cycle-length as s1) and then a delayed beat (s3) delivered after a varying pause (from 1000 to 3000 ms). The stimulus is applied to the first cell.

*ECG computation*

Extracellular unipolar potentials (Φe) generated by the fiber in an extensive medium of conductivity σe, were computed from the transmembrane potential *Vm* using the integral expression as in Gima and Rudy [8]:

where ∇*V* is the spatial gradient of *Vm*, *a* is the radius of the fiber, *σi* is the intracellular conductivity, *σe* is the extracellular conductivity, and *r* is the distance from a source point (x, y, z) to a field point (x’, y’, z’). *Φe* was computed at an “electrode” site 2.0 cm away from the distal end along the fiber axis.

*Two-dimensional simulations*

Where *V* is the membrane potential, *x* and *y* are distances in the longitudinal and transverse directions, respectively, Dx and Dy are diffusion coefficients in the x and y directions, and all other parameters are as in the one-dimensional simulations. *Istim*is 80 mA/cm2 for 1 ms. We simulated a heterogeneous cardiac tissue on 600 by 1000 with x = y = 100 m. The tissue contains an endocardial region (fibers 1 to 240), M-cell region (fibers 241 to 420) and epicardial region (fibers 421 to 600). In guinea pig heart, the density ratio of IKs to IKr is about 23:7:15 in epi-/mid-/endocardial cells [7]. The exact scaling constants of GKs for epicardial, mid- and endocardial cells are 0.433, 0.125 and 0.289, respectively. We also incorporated anisotropic effects by setting Dx and Dy such that the longitudinal and transverse conduction velocities are 0.56 m/s and 0.26 m/s, respectively.

The 2D tissue was simulated using a typical short-long-short protocol [9,10]. The tissue was first paced for 10 beats (s1) at BCL = 1000 ms on the entire length of one side of tissue. A premature stimulus (s2) was then applied in a 1 cm  1 cm area on the right edge of the endocardial region and then a delayed beat (s3) was delivered after a long pause (1700 ms). Following the s3, another premature beat (s4) was applied in the same square region as s2 to simulate a short-long-short ventricular cycle (Figure S4 – protocol 1).

**References**

1. Kurokawa J, Tamagawa M, Harada N, Honda SI, Bai CX, et al. (2008) Acute effects of estrogen on the guinea pig and human IKr channels and drug-induced prolongation of cardiac repolarization. J Physiol.

2. Clancy CE, Rudy Y (2001) Cellular consequences of HERG mutations in the long QT syndrome: precursors to sudden cardiac death. Cardiovasc Res 50: 301-313.

3. Bai CX, Kurokawa J, Tamagawa M, Nakaya H, Furukawa T (2005) Nontranscriptional regulation of cardiac repolarization currents by testosterone. Circulation 112: 1701-1710.

4. Nakamura H, Kurokawa J, Bai CX, Asada K, Xu J, et al. (2007) Progesterone regulates cardiac repolarization through a nongenomic pathway: an in vitro patch-clamp and computational modeling study. Circulation 116: 2913-2922.

5. Faber GM, Rudy Y (2000) Action potential and contractility changes in [Na(+)](i) overloaded cardiac myocytes: a simulation study. Biophys J 78: 2392-2404.

6. Shaw RM, Rudy Y (1997) Electrophysiologic effects of acute myocardial ischemia. A mechanistic investigation of action potential conduction and conduction failure. Circ Res 80: 124-138.

7. Viswanathan PC, Shaw RM, Rudy Y (1999) Effects of IKr and IKs heterogeneity on action potential duration and its rate dependence: a simulation study. Circulation 99: 2466-2474.

8. Gima K, Rudy Y (2002) Ionic current basis of electrocardiographic waveforms: a model study. Circ Res 90: 889-896.

9. Liu J, Laurita KR (2005) The mechanism of pause-induced torsade de pointes in long QT syndrome. J Cardiovasc Electrophysiol 16: 981-987.

10. Yan GX, Wu Y, Liu T, Wang J, Marinchak RA, et al. (2001) Phase 2 early afterdepolarization as a trigger of polymorphic ventricular tachycardia in acquired long-QT syndrome : direct evidence from intracellular recordings in the intact left ventricular wall. Circulation 103: 2851-2856.
